# Supplementary material for: Analysis of genomic differences among Clostridium botulinum type A1 strains
Source: Springer Nature journal article supplement (doi:10.1186/1471-2164-11-725), 2010-12-01

ATCC 3502  
Genome Positions

2351753 (CBO2200) ← → 2379161 (CBO2220)

Normalized Ratio

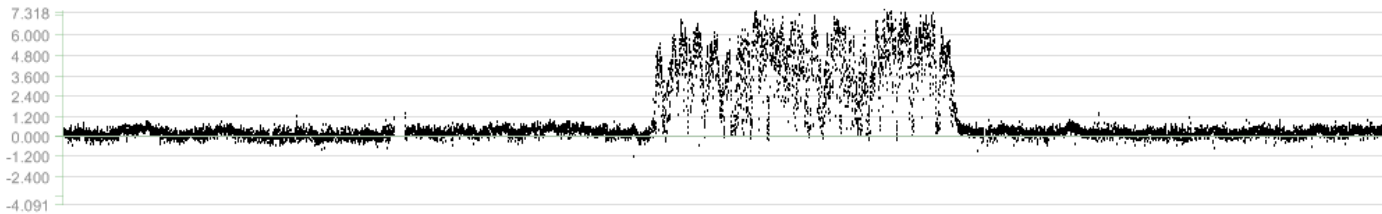

UMASS Strain  
Raw Signal Intensity

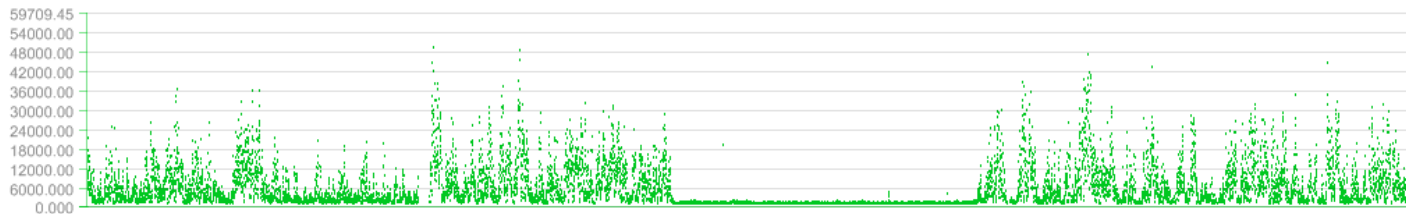

ATCC 3502\* Strain  
Raw Signal Intensity

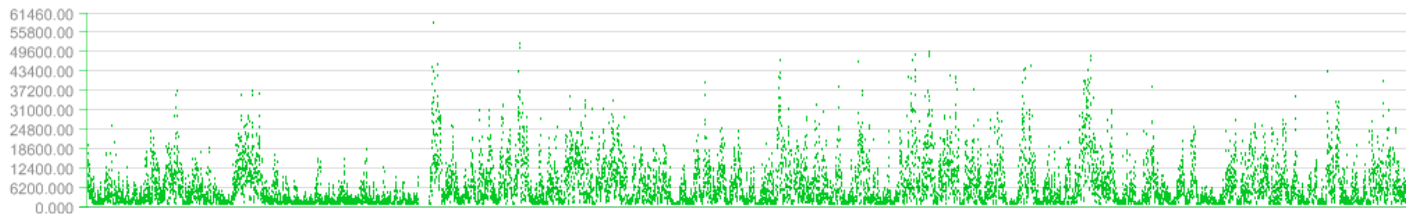

Supplement: 12864_2010_3422_MOESM1_ESM.pdf [file 12864_2010_3422_MOESM1_ESM.pdf]
