# Supplementary material for: Analysis of genomic differences among Clostridium botulinum type A1 strains
Source: Springer Nature journal article supplement (doi:10.1186/1471-2164-11-725), 2010-12-01
Supplement: 12864_2010_3422_MOESM4_ESM.pdf [file 12864_2010_3422_MOESM4_ESM.pdf]

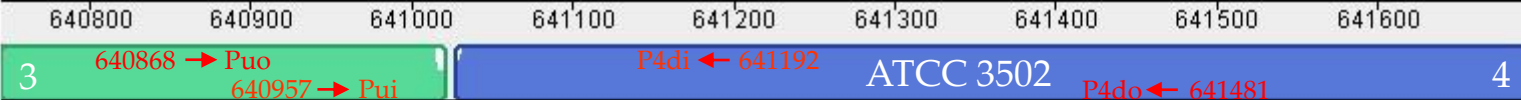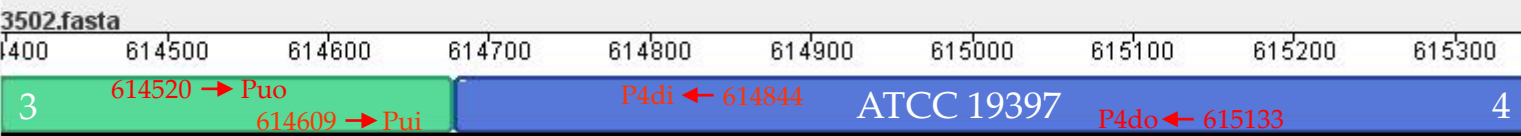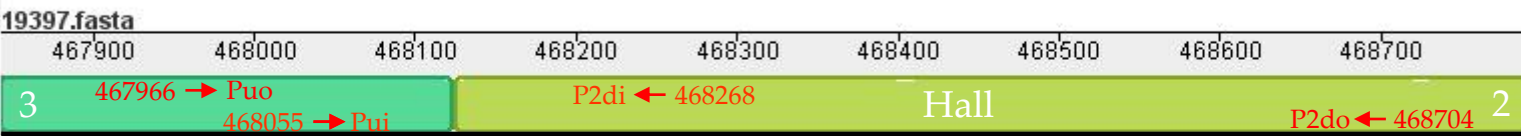

Hall.fasta
