# Supplementary material for: Analysis of genomic differences among Clostridium botulinum type A1 strains
Source: Springer Nature journal article supplement (doi:10.1186/1471-2164-11-725), 2010-12-01

|                    | 1    | 2    | 3    | 4    | 5    | 6    | 7    | 8    |
|--------------------|------|------|------|------|------|------|------|------|
| Upstream Primers   | Puo  | Puo  | Pui  | Pui  | Puo  | Puo  | Pui  | Pui  |
| Downstream Primers | P4do | P4di | P4do | P4di | P2do | P2di | P2do | P2di |
| Expected Size (bp) | 614  | 325  | 525  | 236  | 739  | 303  | 650  | 214  |

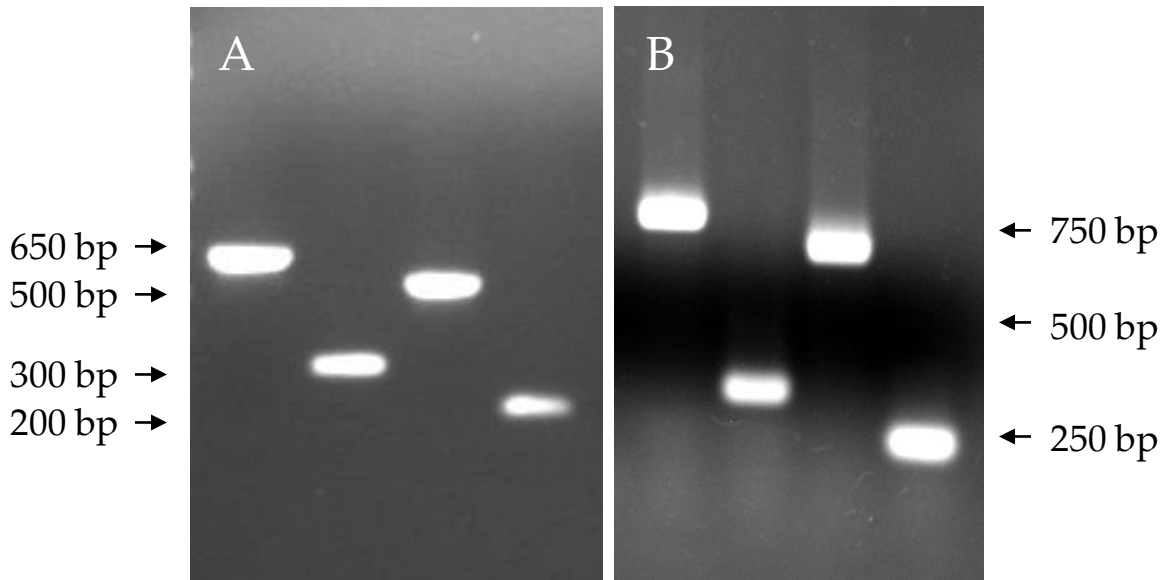

Supplement: 12864_2010_3422_MOESM5_ESM.pdf [file 12864_2010_3422_MOESM5_ESM.pdf]
